# Supplementary material for: Vacancy-and doping-mediated electronic and magnetic properties of PtSSe monolayer towards optoelectronic and spintronic applications
Source: Royal Society of Chemistry journal article supplement (doi:10.1039/d4ra02071e), 2024-01-01
Supplement: d4ra02071e1.pdf [file d4ra02071e1.pdf]

## Vacancy-and doping-mediated electronic and magnetic properties of PtSSe monolayer towards optoelectronic and spintronic applications

Duy Khanh Nguyen,<sup>1,2</sup> R Ponce-Pérez,<sup>3</sup> J. Guerrero-Sanchez,<sup>3</sup> and D. M. Hoat<sup>4,5,\*</sup>

<sup>1</sup>Laboratory for Computational Physics, Institute for Computational Science and Artificial Intelligence, Van Lang University, Ho Chi Minh City

<sup>2</sup>Faculty of Mechanical - Electrical and Computer Engineering, School of Technology, Van Lang University, Ho Chi Minh City, Vietnam

<sup>3</sup>Universidad Nacional Autónoma de México, Centro de Nanociencias y Nanotecnología, Apartado Postal 14, Ensenada, Baja California, Código Postal 22800, Mexico

<sup>4</sup>Institute of Theoretical and Applied Research, Duy Tan University, Ha Noi 100000, Viet Nam

<sup>5</sup>Faculty of Natural Sciences, Duy Tan University, Da Nang 550000, Viet Nam

\*Corresponding author: [dominhhoat@duytan.edu.vn](mailto:dominhhoat@duytan.edu.vn)

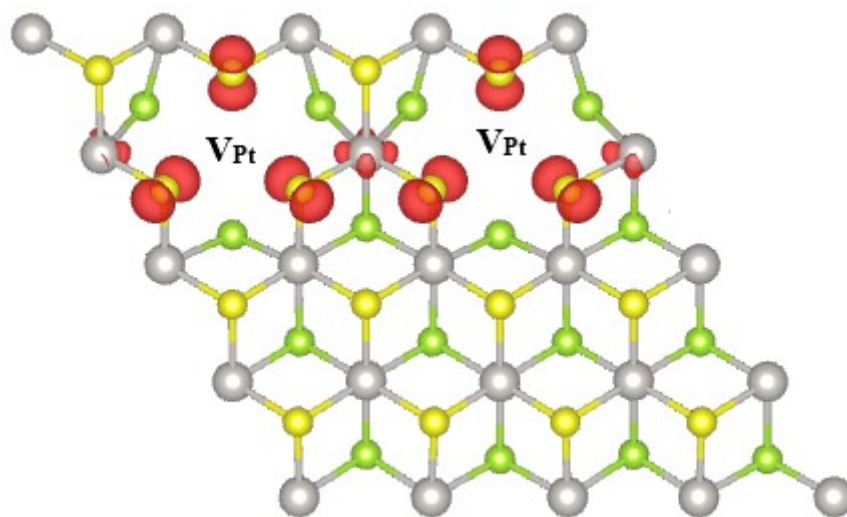

Figure S1: Spin density (Iso-surface value:  $0.01 e/\text{\AA}^3$ ) in PtSSe monolayer with 12.5% of Pt vacancy.

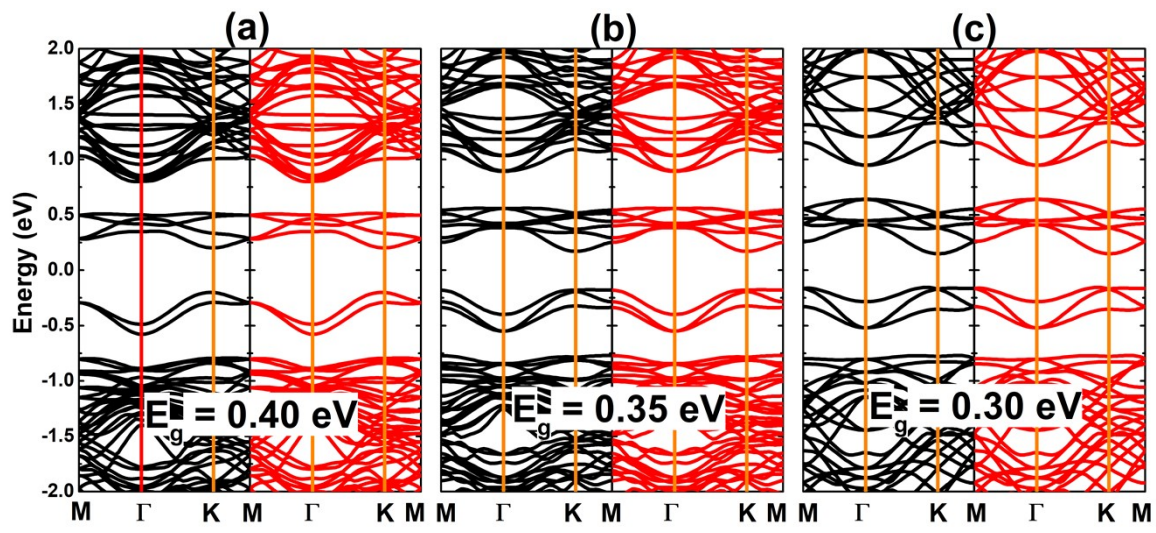

Figure S2: Spin-polarized band structure of PtSSe monolayer with (a) 12.5%, (b) 18.75%, and (c) 25% of S vacancy.

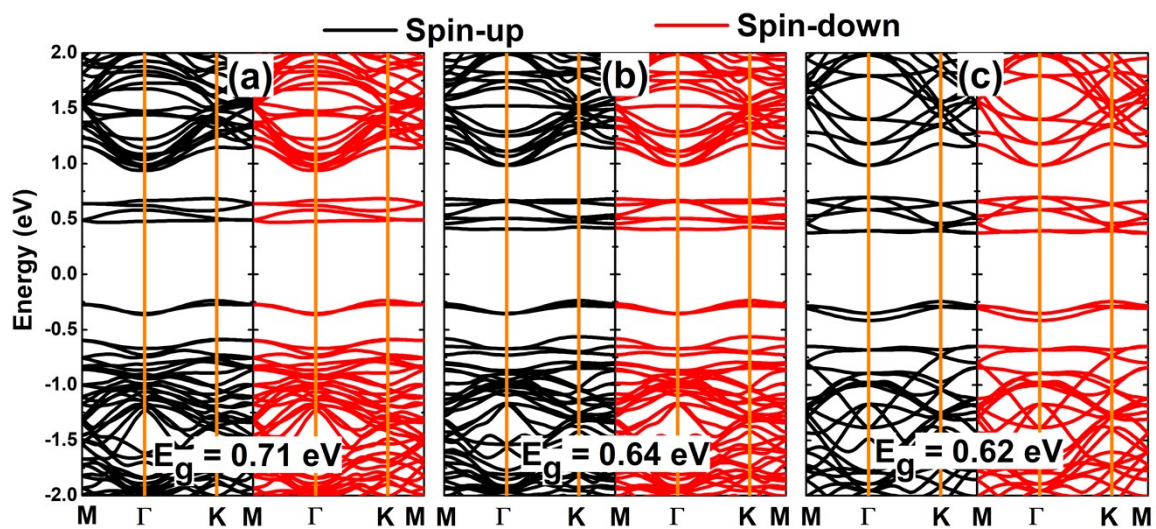

Figure S3: Spin-polarized band structure of PtSSe monolayer with (a) 12.5%, (b) 18.75%, and (c) 25% of Se vacancy.

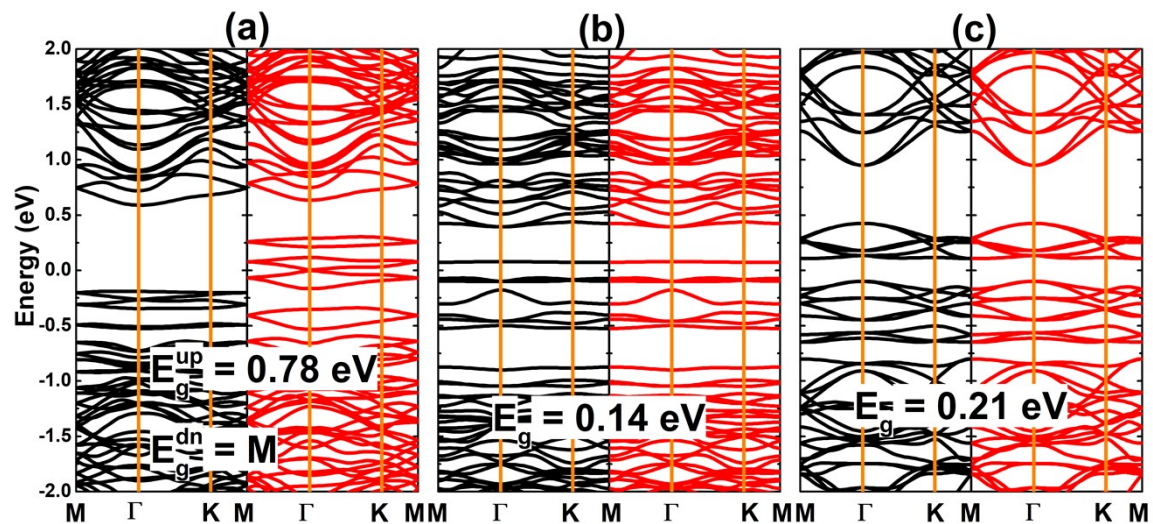

Figure S4: Spin-polarized band structure of PtSSe monolayer with (a) 12.5%, (b) 18.75%, and (c) 25% of Pt vacancy.

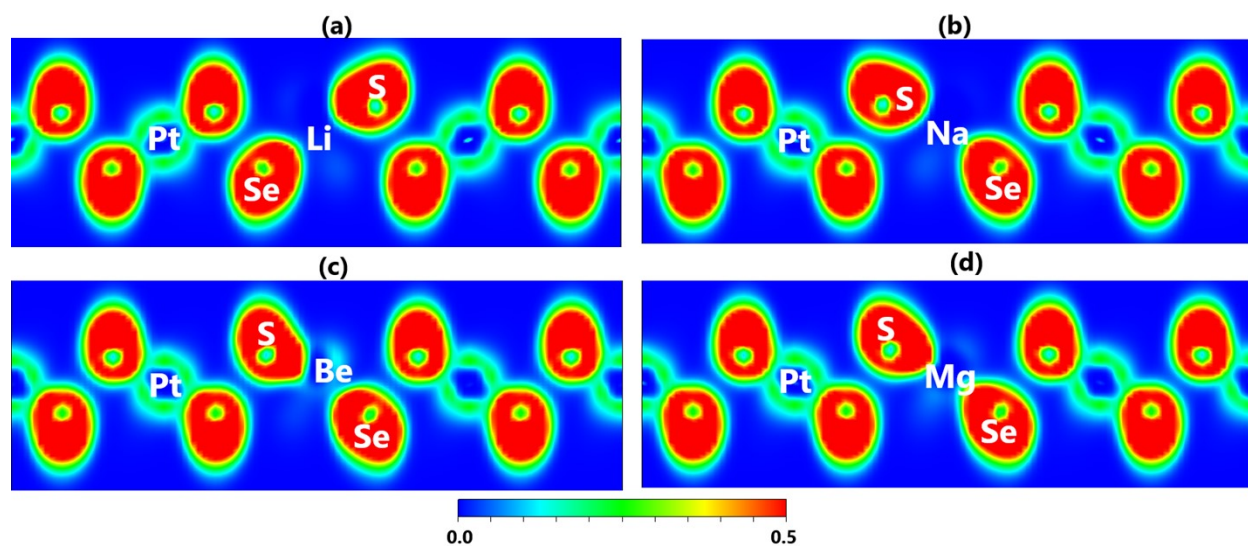

Figure S5: Electron localization functional in (a)  $\text{LiPt}$ , (b)  $\text{NaPt}$ , (c)  $\text{BePt}$ , and (d)  $\text{MgPt}$  system.

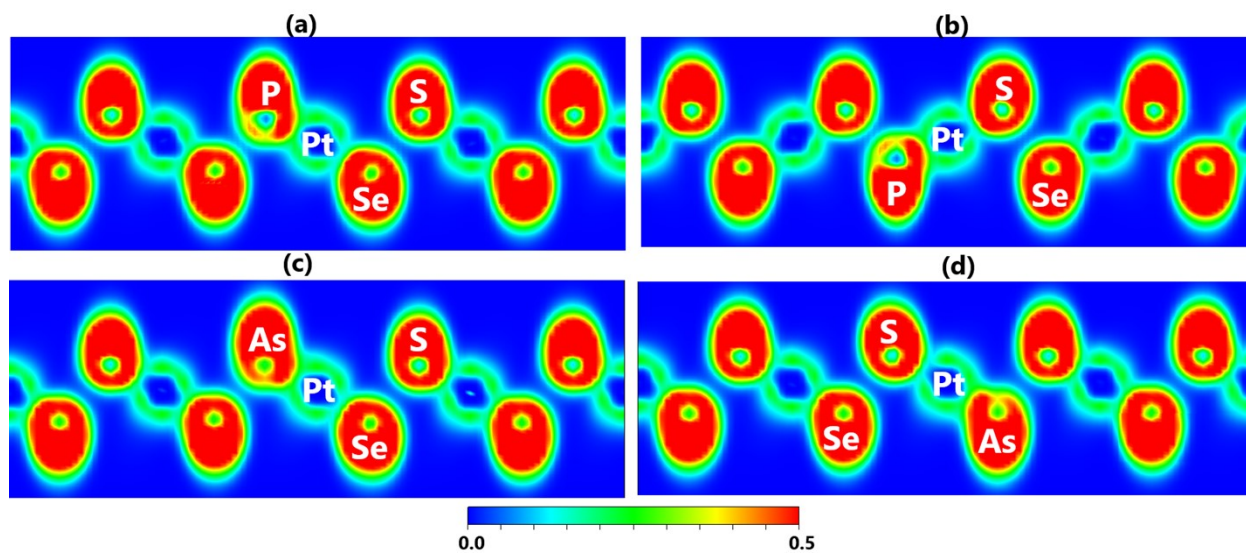

Figure S6: Electron localization functional in (a)  $P_S$ , (b)  $P_{Se}$ , (c)  $As_S$ , and (d)  $As_{Se}$  system.

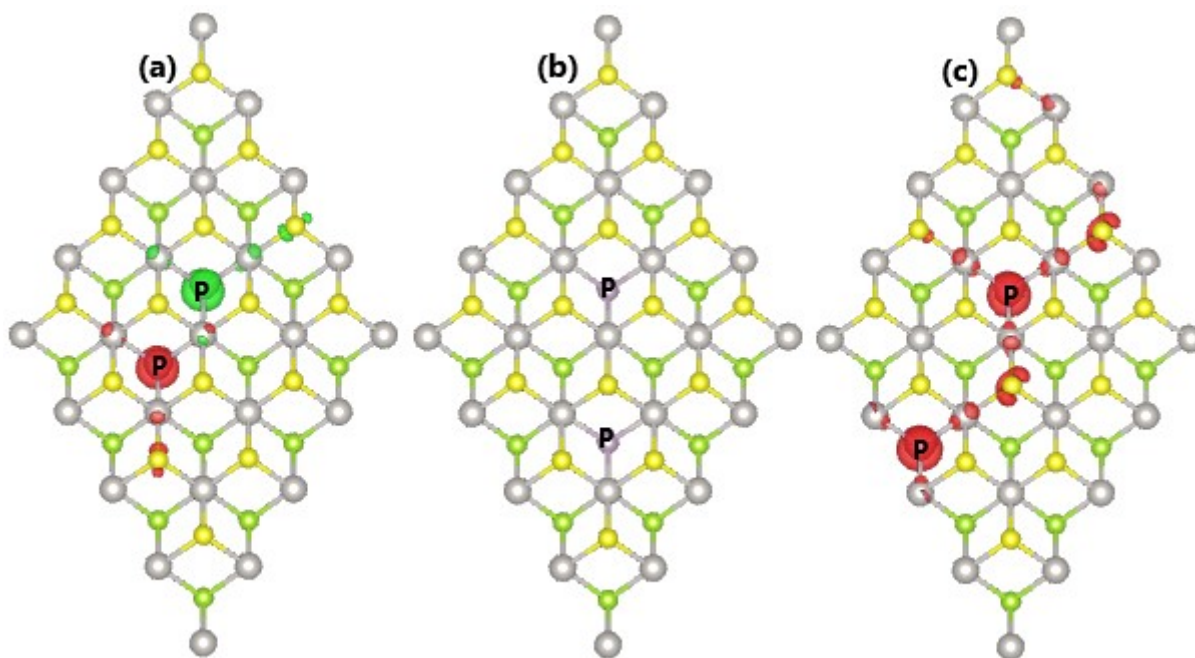

Figure S7: Spin density (Iso-surface value:  $0.005 e/\text{\AA}^3$ ) in (a) Antiferromagnetic, (b) Non-magnetic, and (c) Ferromagnetic 2P-doped PtSSe monolayer.

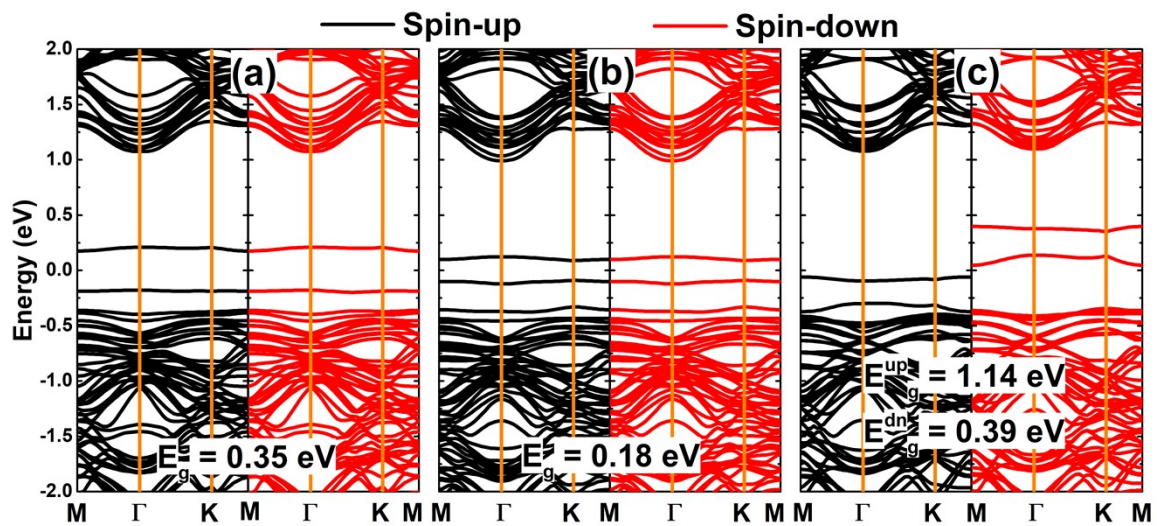

Figure S8: Spin-polarized band structure of (a) Antiferromagnetic, (b) Non-magnetic, and (c) Ferromagnetic 2P-doped PtSse monolayer.
